# Supplementary material for: Anodic generation of hydrogen peroxide in continuous flow
Source: Royal Society of Chemistry journal article supplement (doi:10.1039/d2gc02575b), 2022-01-01
Supplement: d2gc02575b1.pdf [file d2gc02575b1.pdf]

**Supplementary Information for**

**Anodic generation of hydrogen peroxide in continuous flow**

Dhananjai Pangotra <sup>a,b</sup>, Lénárd-István Csepei <sup>a</sup>, Arne Roth <sup>a</sup>, Volker Sieber <sup>a,b</sup>, Luciana Vieira <sup>\*,a</sup>

<sup>a</sup> Fraunhofer Institute of Interfacial Engineering and Biotechnology IGB, Bio-, Electro-, and Chemocatalysis BioCat, Straubing Branch, Schulgasse 11a, 94315, Straubing, Germany

<sup>b</sup> Chair of Chemistry for Biogenic Resources, Campus Straubing for Biotechnology and Sustainability, Technical University of Munich, Schulgasse 16, 94315, Straubing, Germany

## List of figures

- Figure S1 SEM images of used BDD electrode.** SEM images of used BDD in this study at different magnification..... 4
- Figure S2 Comparison of electrolyte conditions using BDD as anode.** Anodic  $\text{H}_2\text{O}_2$  (a) concentration (b) FE, and (c) production rate for  $\text{H}_2\text{O}_2$  production against applied current density during 10 minutes in 25 mL  $2 \text{ mol L}^{-1} \text{ KHCO}_3$  (pH 9) at room temperature and in ice bath using  $5 \text{ cm}^2$  BDD as an anode in a two compartment H-cell. .... 6
- Figure S3 Comparison of electrolyte conditions using BDD as anode.** Anodic  $\text{H}_2\text{O}_2$  (a) production rate and (b) partial current density for  $\text{H}_2\text{O}_2$  production against applied current density during 10 minutes in (■)  $2 \text{ mol L}^{-1} \text{ KHCO}_3$  at pH 8.4, and (▲)  $2 \text{ mol L}^{-1} \text{ K}_2\text{CO}_3$  at pH 12.6 on  $5 \text{ cm}^2$  BDD as an anode. .... 7
- Figure S4 Experimental setup for circular flow.** (1) Cathodic compartment, (2) anodic compartment, (3) flow pump, (4) catholyte tank, and (5) anolyte tank. The anolyte collected in (5) is recirculated to the anodic half-cell and the product is collected in the same reservoir..... 9
- Figure S5 Anodic  $\text{H}_2\text{O}_2$  production in a circular flow reactor.** Anodic  $\text{H}_2\text{O}_2$  (a) production rate, (b) cell potential, and (c) specific energy consumption to produce 1 kg of  $\text{H}_2\text{O}_2$  at different current densities using a circular flow system. .... 10
- Figure S6 Comparison of the sampling time during electrolysis in H-Cell.** (a) Anodic  $\text{H}_2\text{O}_2$  concentration, (b) FE, (c) production rate, and (d) partial current density at different applied current densities for 5 or 10 minutes. The electrolyte was  $2 \text{ mol L}^{-1} \text{ K}_2\text{CO}_3$  at pH 12.6 and the anode a  $5 \text{ cm}^2$  BDD..... 12
- Figure S7  $\text{H}_2\text{O}_2$  generation with multiple electrolyte flow cycles.** Change in (a) conductivity of the electrolyte, (b) cell potential, and (c) energy consumption against time at a current density of 100 and  $300 \text{ mA cm}^{-2}$  in  $2 \text{ mol L}^{-1} \text{ K}_2\text{CO}_3$  with  $90 \text{ mmol L}^{-1} \text{ Na}_2\text{SiO}_3$  stabilizer using  $10 \text{ cm}^2$  BDD as an anode. The total volume of the electrolyte used for each cycle was 200 mL. Experiments were performed in a single flow system. The volume accumulated in each cycle was reused in the following one..... 13
- Figure S8 Effect of  $\text{Na}_2\text{SiO}_3$  stabilizer on  $\text{H}_2\text{O}_2$  generation in circular flow.** Anodic  $\text{H}_2\text{O}_2$  (a) concentration and (b) FE at current density of  $200 \text{ mA cm}^{-2}$  with (■) and without (●)  $90 \text{ mmol L}^{-1} \text{ Na}_2\text{SiO}_3$  at a controlled pH of 12.6. Each cell compartment contained a reservoir with 200 mL of  $2 \text{ mol L}^{-1} \text{ K}_2\text{CO}_3$  electrolyte circulating at  $100 \text{ mL min}^{-1}$  flow rate..... 14
- Figure S9 Experimental setup of single-pass flow.** (1) Cathodic compartment, (2) anodic compartment, (3) flow pump, (4) catholyte tank, (5) fresh anolyte tank before cell, and (6) collected anolyte containing  $\text{H}_2\text{O}_2$  after flow cell. .... 15
- Figure S10 Anodic  $\text{H}_2\text{O}_2$  production in a single pass mode flow reactor.** (a) Volume of electrolyte passed over time using a flow rate of  $10 \text{ mL min}^{-1}$ . (b)  $\text{H}_2\text{O}_2$  concentration, (c) FE, and (d) current density towards  $\text{H}_2\text{O}_2$  during 20 min of electrolysis. Change in (e) pH and (f) conductivity of the electrolyte at different current density in  $2 \text{ mol L}^{-1} \text{ K}_2\text{CO}_3 + 90 \text{ mmol L}^{-1} \text{ Na}_2\text{SiO}_3$ . Initial and final pH and conductivity corresponds to 0 and 20 minutes..... 16

**Figure S11 Anodic H<sub>2</sub>O<sub>2</sub> production in a single pass mode flow reactor.** Cell potential at different current densities using 10 mL min<sup>-1</sup> flow rate without recirculation in 2 mol L<sup>-1</sup> K<sub>2</sub>CO<sub>3</sub> + 90 mmol L<sup>-1</sup> Na<sub>2</sub>SiO<sub>3</sub>. ..... 17

**Figure S12 Anodic H<sub>2</sub>O<sub>2</sub> generation at different electrolyte flow rates.** Specific electricity cost based on energy consumption to produce 1 kg of H<sub>2</sub>O<sub>2</sub> at different flow rates. Experiment conditions: Flow cell with 200 mL anolyte at a constant current density (*j*) of 300 mA cm<sup>-2</sup>. ..... 19

### List of tables

**Table S1 Anodic H<sub>2</sub>O<sub>2</sub> production in a circular flow reactor.** Faradaic efficiency and corresponding specific energy consumption to produce 1 kg of H<sub>2</sub>O<sub>2</sub> over time at different current densities using a circular flow system..... 11

**Table S2** A comparison of the reported work on water oxidation to H<sub>2</sub>O<sub>2</sub> with our present study..... 18

### List of schemes

**Scheme S1 Scheme for anodic H<sub>2</sub>O<sub>2</sub> production in carbonate electrolyte.** Carbonate (CO<sub>3</sub><sup>2-</sup>) can be anodically oxidized to peroxodicarbonate (C<sub>2</sub>O<sub>6</sub><sup>2-</sup>) species. C<sub>2</sub>O<sub>6</sub><sup>2-</sup> undergoes hydrolysis to form bicarbonate (HCO<sub>3</sub><sup>-</sup>) and hydrogen peroxide (H<sub>2</sub>O<sub>2</sub>). In alkaline electrolytes, HCO<sub>3</sub><sup>-</sup> ions are deprotonated to CO<sub>3</sub><sup>2-</sup>, which closes the cycle with a higher concentration of H<sub>2</sub>O<sub>2</sub>.<sup>1</sup> ..... 8

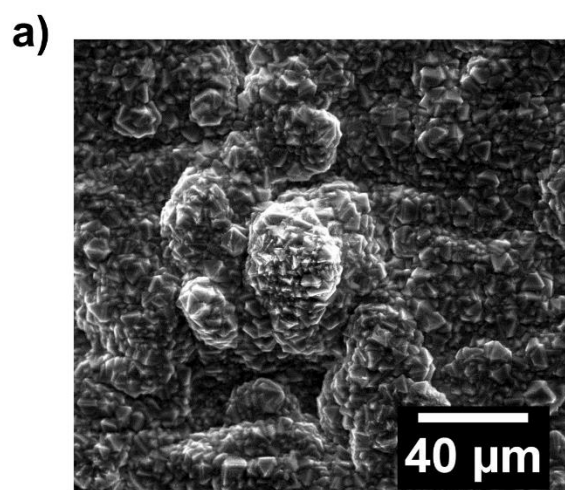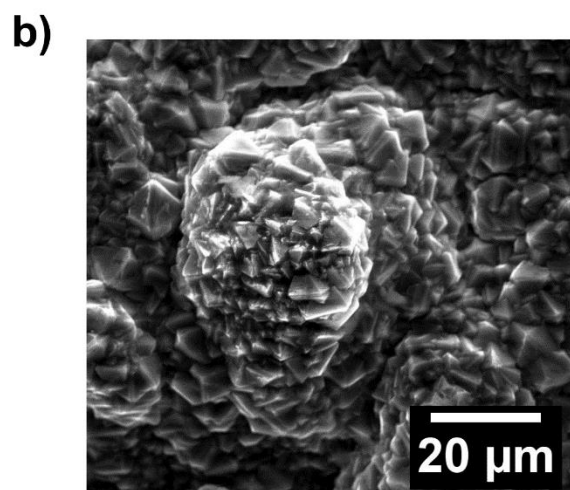

**Figure S1 SEM images of used BDD electrode.** SEM images of used BDD in this study at different magnification.

The molar fractions for each species were calculated using **Eqs. S2** and **S3**. The experiments were done in highly concentrated electrolytes, which differ from the ideal behavior of diluted electrolytes. As a result, the ion activities ( $a_{\text{HCO}_3^-}$  and  $a_{\text{CO}_3^{2-}}$ ) were calculated as shown in **Eqs. S4** and **S5** using the activity coefficient ( $f_{\pm}$ ) shown in **Eq. S6**, where  $z_i$  is the charge of the ion, A is the Debye-Hückel parameter (0.51  $\text{kg}^{1/2} \text{mol}^{-1/2}$ , for water at 25 °C), and B is a temperature-dependent parameter. In response to pH changes and carbonate equilibrium, we calculated the activity of  $\text{HCO}_3^-$  ( $a(\text{HCO}_3^-)$ ) and  $\text{CO}_3^{2-}$  ( $a(\text{CO}_3^{2-})$ ) ions during electrolysis for each concentration (c) of  $\text{KHCO}_3$ .

$$K_{a,i} = 10^{-pK_{a,i}} \quad (\text{S1})$$

$$\alpha_{\text{HCO}_3^-} = \frac{K_{a,1} \cdot [\text{H}^+]}{[\text{H}^+]^2 + K_{a,1} \cdot [\text{H}^+] + K_{a,1} \cdot K_{a,2}} \quad (\text{S2})$$

$$\alpha_{\text{CO}_3^{2-}} = \frac{K_{a,1} \cdot K_{a,2}}{[\text{H}^+]^2 + K_{a,1} \cdot [\text{H}^+] + K_{a,1} \cdot K_{a,2}} \quad (\text{S3})$$

$$a_{\text{HCO}_3^-} = \alpha_{\text{HCO}_3^-} \cdot c_{\text{KHCO}_3} \cdot f_{\pm} \quad (\text{S4})$$

$$a_{\text{CO}_3^{2-}} = \alpha_{\text{CO}_3^{2-}} \cdot c_{\text{KHCO}_3} \cdot f_{\pm} \quad (\text{S5})$$

$$\log f_{\pm} = - \frac{A \cdot z_i^2 \cdot \sqrt{I}}{1 + B \cdot a_i \cdot \sqrt{I}} \quad (\text{S6})$$

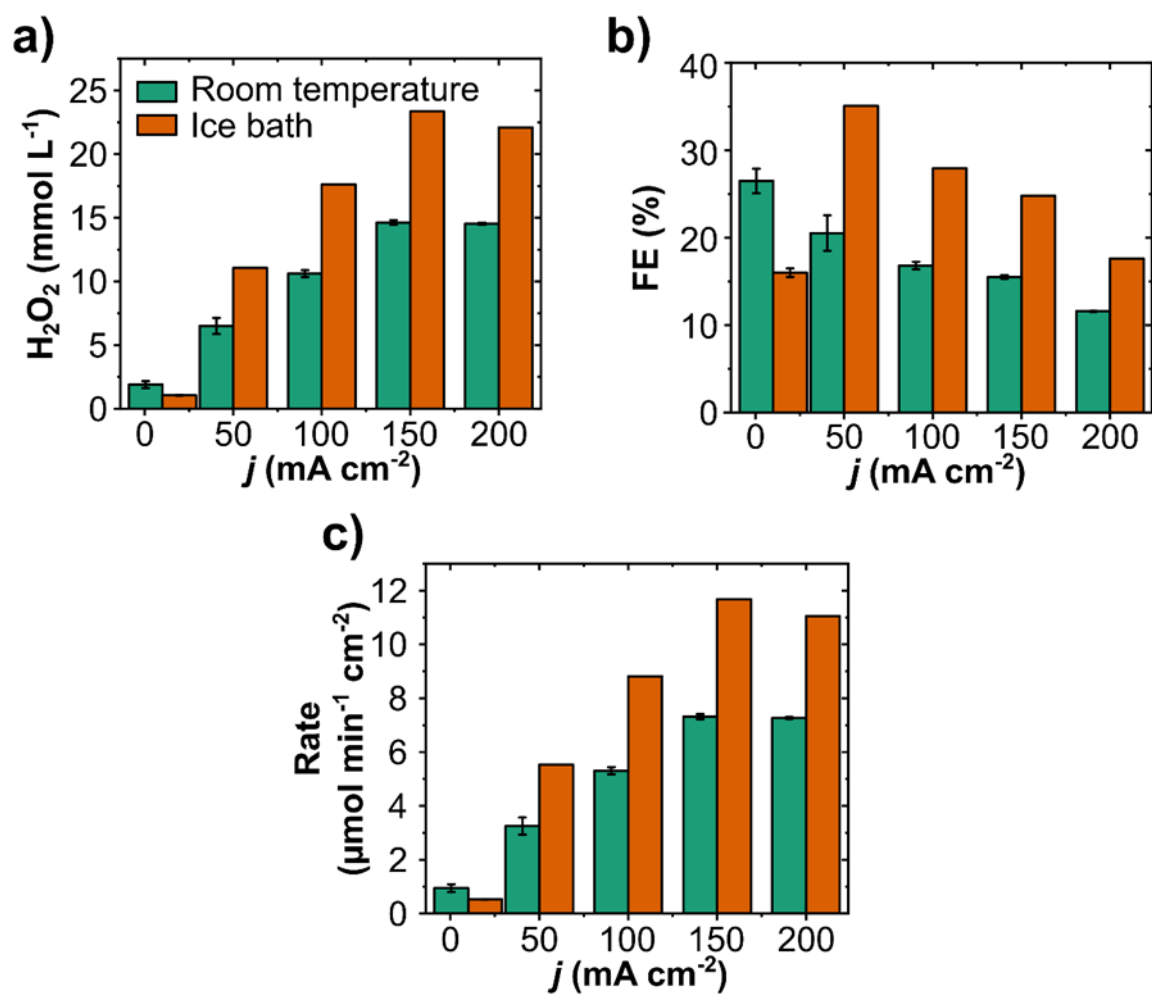

**Figure S2 Comparison of electrolyte conditions using BDD as anode.** Anodic  $\text{H}_2\text{O}_2$  (a) concentration (b) FE, and (c) production rate for  $\text{H}_2\text{O}_2$  production against applied current density during 10 minutes in 25 mL  $2 \text{ mol L}^{-1}$   $\text{KHCO}_3$  (pH 9) at room temperature and in ice bath using  $5 \text{ cm}^2$  BDD as an anode in a two compartment H-cell.

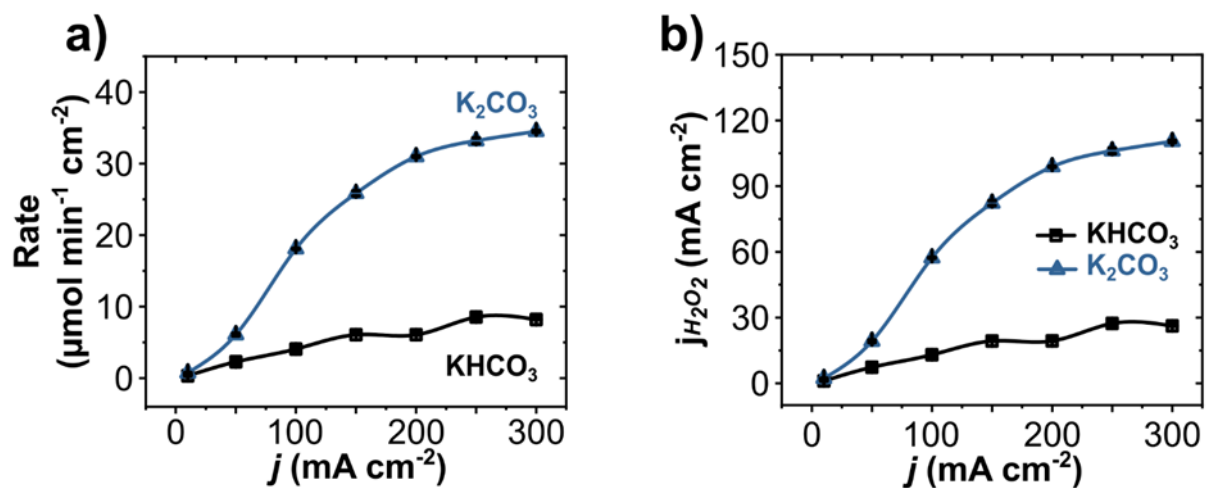

**Figure S3 Comparison of electrolyte conditions using BDD as anode.** Anodic  $\text{H}_2\text{O}_2$  (a) production rate and (b) partial current density for  $\text{H}_2\text{O}_2$  production against applied current density during 10 minutes in (■)  $2 \text{ mol L}^{-1}$   $\text{KHCO}_3$  at pH 8.4, and (▲)  $2 \text{ mol L}^{-1}$   $\text{K}_2\text{CO}_3$  at pH 12.6 on  $5 \text{ cm}^2$  BDD as an anode.

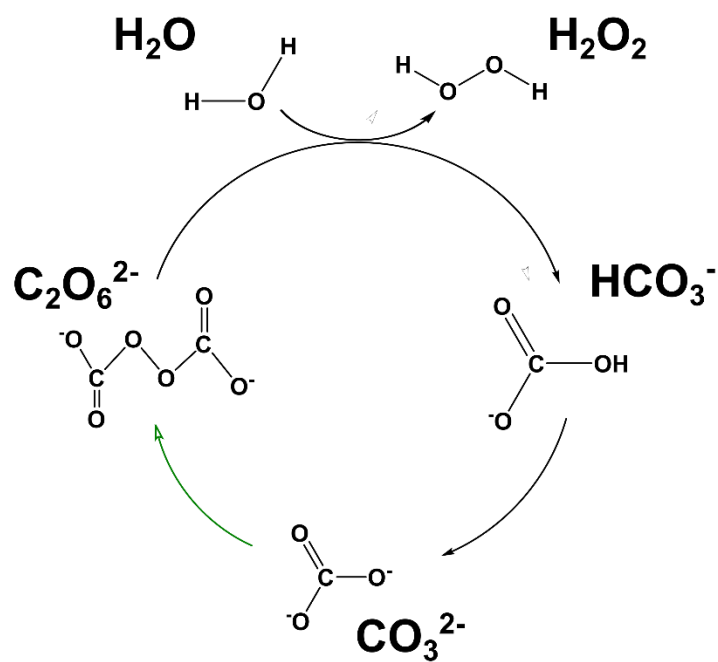

**Scheme S1 Scheme for anodic  $\text{H}_2\text{O}_2$  production in carbonate electrolyte.** Carbonate ( $\text{CO}_3^{2-}$ ) can be anodically oxidized to peroxodicate ( $\text{C}_2\text{O}_6^{2-}$ ) species.  $\text{C}_2\text{O}_6^{2-}$  undergoes hydrolysis to form bicarbonate ( $\text{HCO}_3^-$ ) and hydrogen peroxide ( $\text{H}_2\text{O}_2$ ). In alkaline electrolytes,  $\text{HCO}_3^-$  ions are deprotonated to  $\text{CO}_3^{2-}$ , which closes the cycle with a higher concentration of  $\text{H}_2\text{O}_2$ .<sup>1</sup>



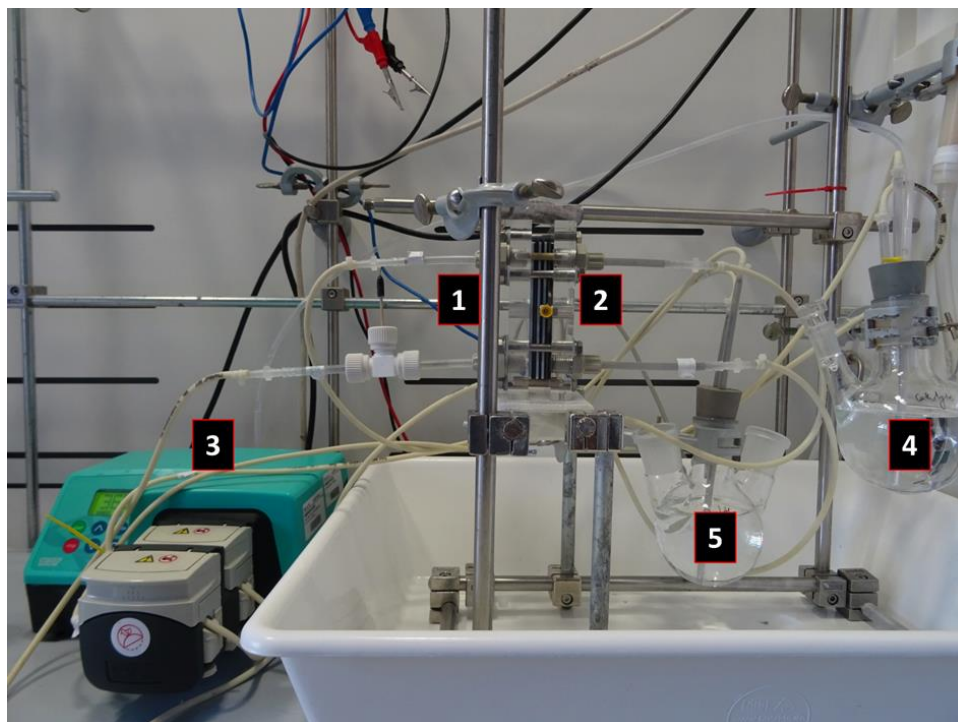

**Figure S4 Experimental setup for circular flow.** (1) Cathodic compartment, (2) anodic compartment, (3) flow pump, (4) catholyte tank, and (5) anolyte tank. The anolyte collected in (5) is recirculated to the anodic half-cell and the product is collected in the same reservoir.

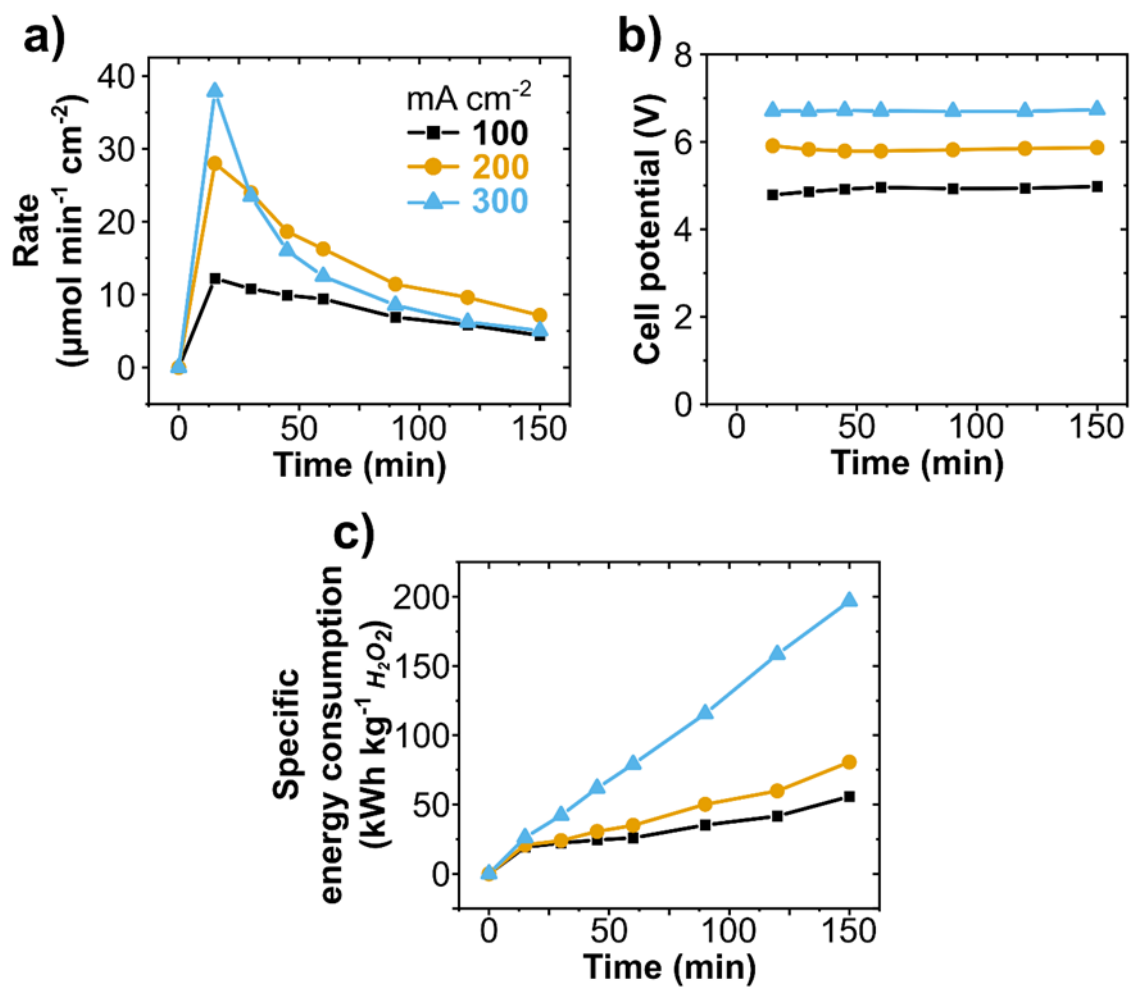

**Figure S5 Anodic H<sub>2</sub>O<sub>2</sub> production in a circular flow reactor.** Anodic H<sub>2</sub>O<sub>2</sub> (a) production rate, (b) cell potential, and (c) specific energy consumption to produce 1 kg of H<sub>2</sub>O<sub>2</sub> at different current densities using a circular flow system.

**Table S1 Anodic H<sub>2</sub>O<sub>2</sub> production in a circular flow reactor.** Faradaic efficiency and corresponding specific energy consumption to produce 1 kg of H<sub>2</sub>O<sub>2</sub> over time at different current densities using a circular flow system.

| Time<br>(min) | Faradaic efficiency<br>(%)       |                                  |                                  | Specific energy consumption<br>(kWh <sup>-1</sup> kg <sup>-1</sup> ) |                                  |                                  |
|---------------|----------------------------------|----------------------------------|----------------------------------|----------------------------------------------------------------------|----------------------------------|----------------------------------|
|               | 100<br><i>mA cm<sup>-2</sup></i> | 200<br><i>mA cm<sup>-2</sup></i> | 300<br><i>mA cm<sup>-2</sup></i> | 100<br><i>mA cm<sup>-2</sup></i>                                     | 200<br><i>mA cm<sup>-2</sup></i> | 300<br><i>mA cm<sup>-2</sup></i> |
| 15            | 39.09                            | 44.86                            | 40.41                            | 0.58                                                                 | 0.62                             | 0.79                             |
| 30            | 34.55                            | 38.42                            | 25.08                            | 0.67                                                                 | 0.72                             | 1.27                             |
| 45            | 31.72                            | 29.91                            | 17.13                            | 0.73                                                                 | 0.92                             | 1.86                             |
| 60            | 30.13                            | 26.09                            | 13.37                            | 0.78                                                                 | 1.05                             | 2.37                             |
| 90            | 22.07                            | 18.31                            | 9.14                             | 1.06                                                                 | 1.50                             | 3.47                             |
| 120           | 18.70                            | 15.41                            | 6.67                             | 1.25                                                                 | 1.80                             | 4.75                             |
| 150           | 14.08                            | 11.48                            | 5.40                             | 1.67                                                                 | 2.42                             | 5.90                             |

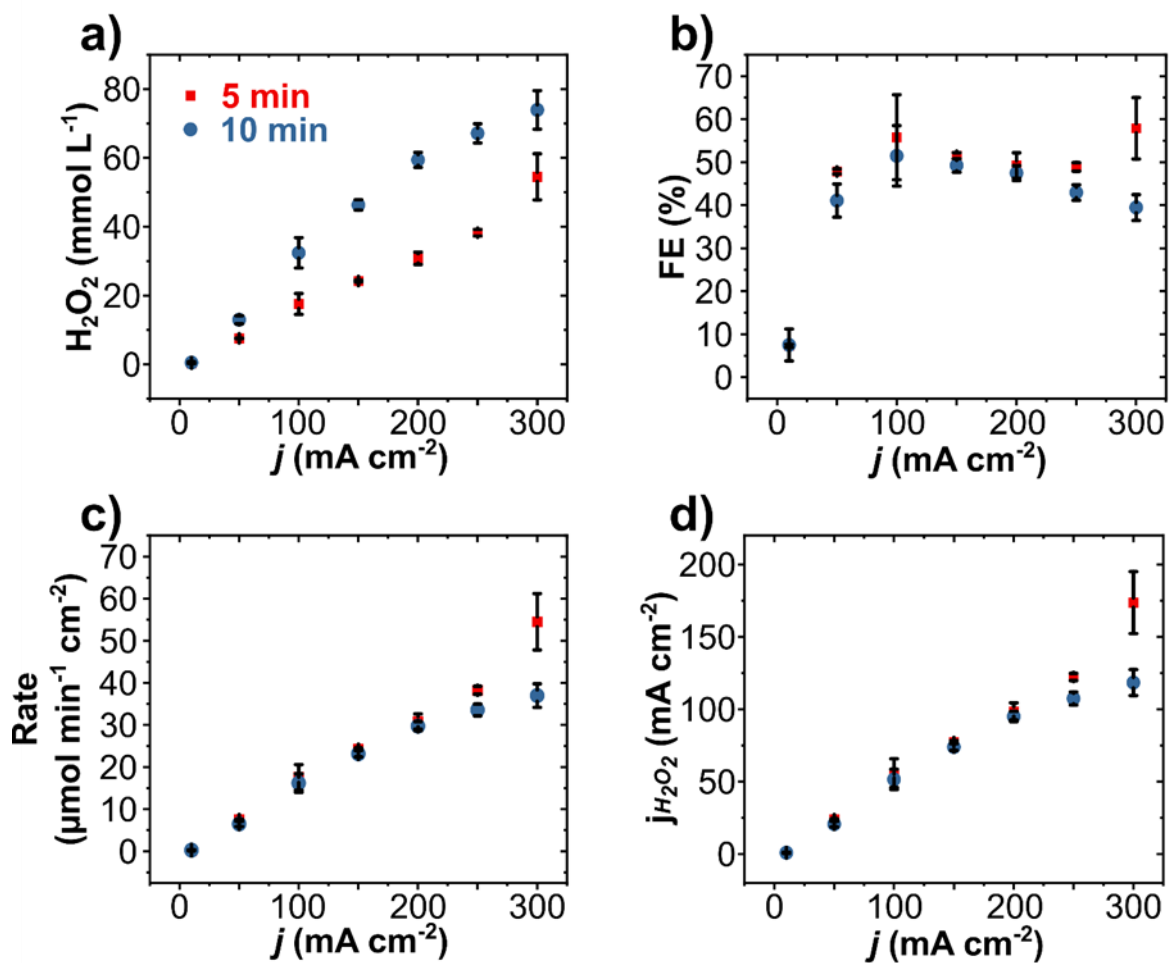

**Figure S6 Comparison of the sampling time during electrolysis in H-Cell. (a)** Anodic  $\text{H}_2\text{O}_2$  concentration, **(b)** FE, **(c)** production rate, and **(d)** partial current density at different applied current densities for 5 or 10 minutes. The electrolyte was  $2 \text{ mol L}^{-1} \text{ K}_2\text{CO}_3$  at pH 12.6 and the anode a  $5 \text{ cm}^2$  BDD.

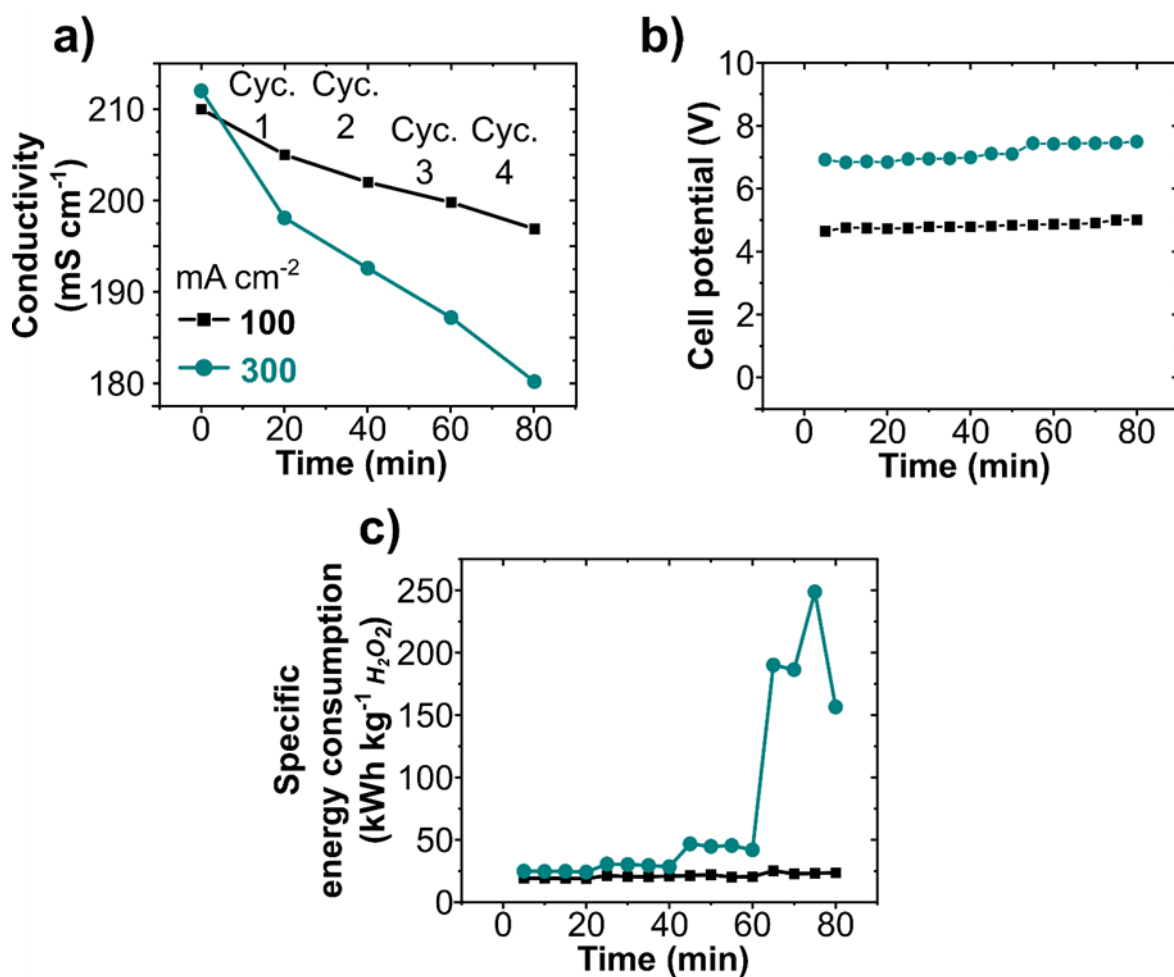

**Figure S7 H<sub>2</sub>O<sub>2</sub> generation with multiple electrolyte flow cycles.** Change in (a) conductivity of the electrolyte, (b) cell potential, and (c) energy consumption against time at a current density of 100 and 300 mA cm<sup>-2</sup> in 2 mol L<sup>-1</sup> K<sub>2</sub>CO<sub>3</sub> with 90 mmol L<sup>-1</sup> Na<sub>2</sub>SiO<sub>3</sub> stabilizer using 10 cm<sup>2</sup> BDD as an anode. The total volume of the electrolyte used for each cycle was 200 mL. Experiments were performed in a single flow system. The volume accumulated in each cycle was reused in the following one.

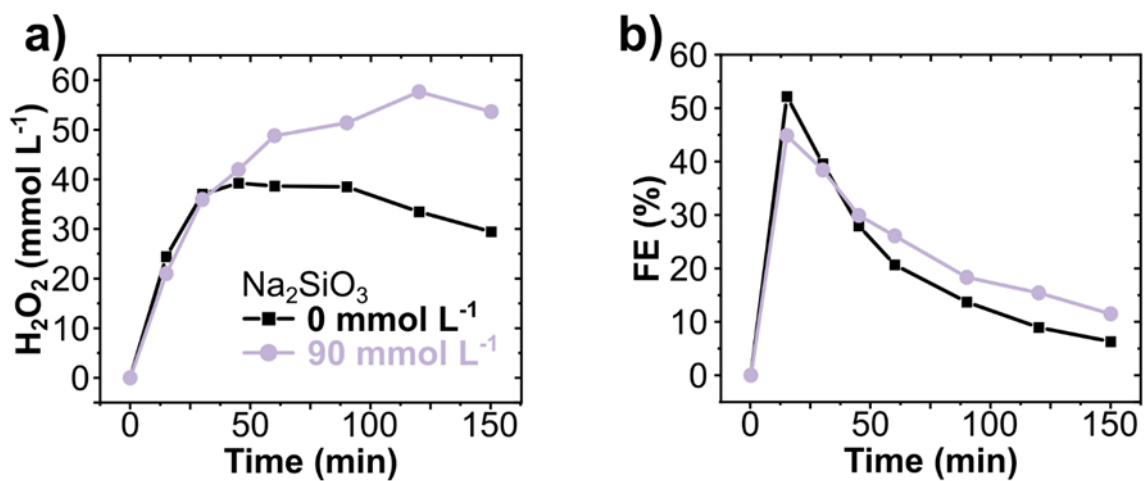

**Figure S8 Effect of  $\text{Na}_2\text{SiO}_3$  stabilizer on  $\text{H}_2\text{O}_2$  generation in circular flow.** Anodic  $\text{H}_2\text{O}_2$  (a) concentration and (b) FE at current density of  $200 \text{ mA cm}^{-2}$  with (■) and without (●)  $90 \text{ mmol L}^{-1}$   $\text{Na}_2\text{SiO}_3$  at a controlled pH of 12.6. Each cell compartment contained a reservoir with  $200 \text{ mL}$  of  $2 \text{ mol L}^{-1}$   $\text{K}_2\text{CO}_3$  electrolyte circulating at  $100 \text{ mL min}^{-1}$  flow rate.

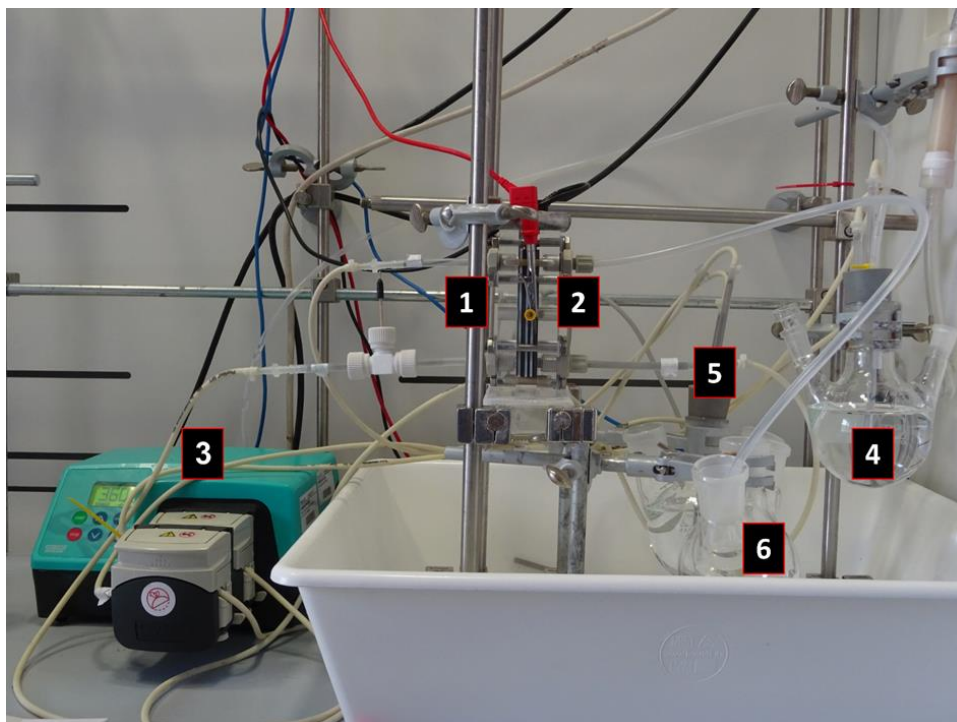

**Figure S9 Experimental setup of single-pass flow. (1) Cathodic compartment, (2) anodic compartment, (3) flow pump, (4) catholyte tank, (5) fresh anolyte tank before cell, and (6) collected anolyte containing  $\text{H}_2\text{O}_2$  after flow cell.**

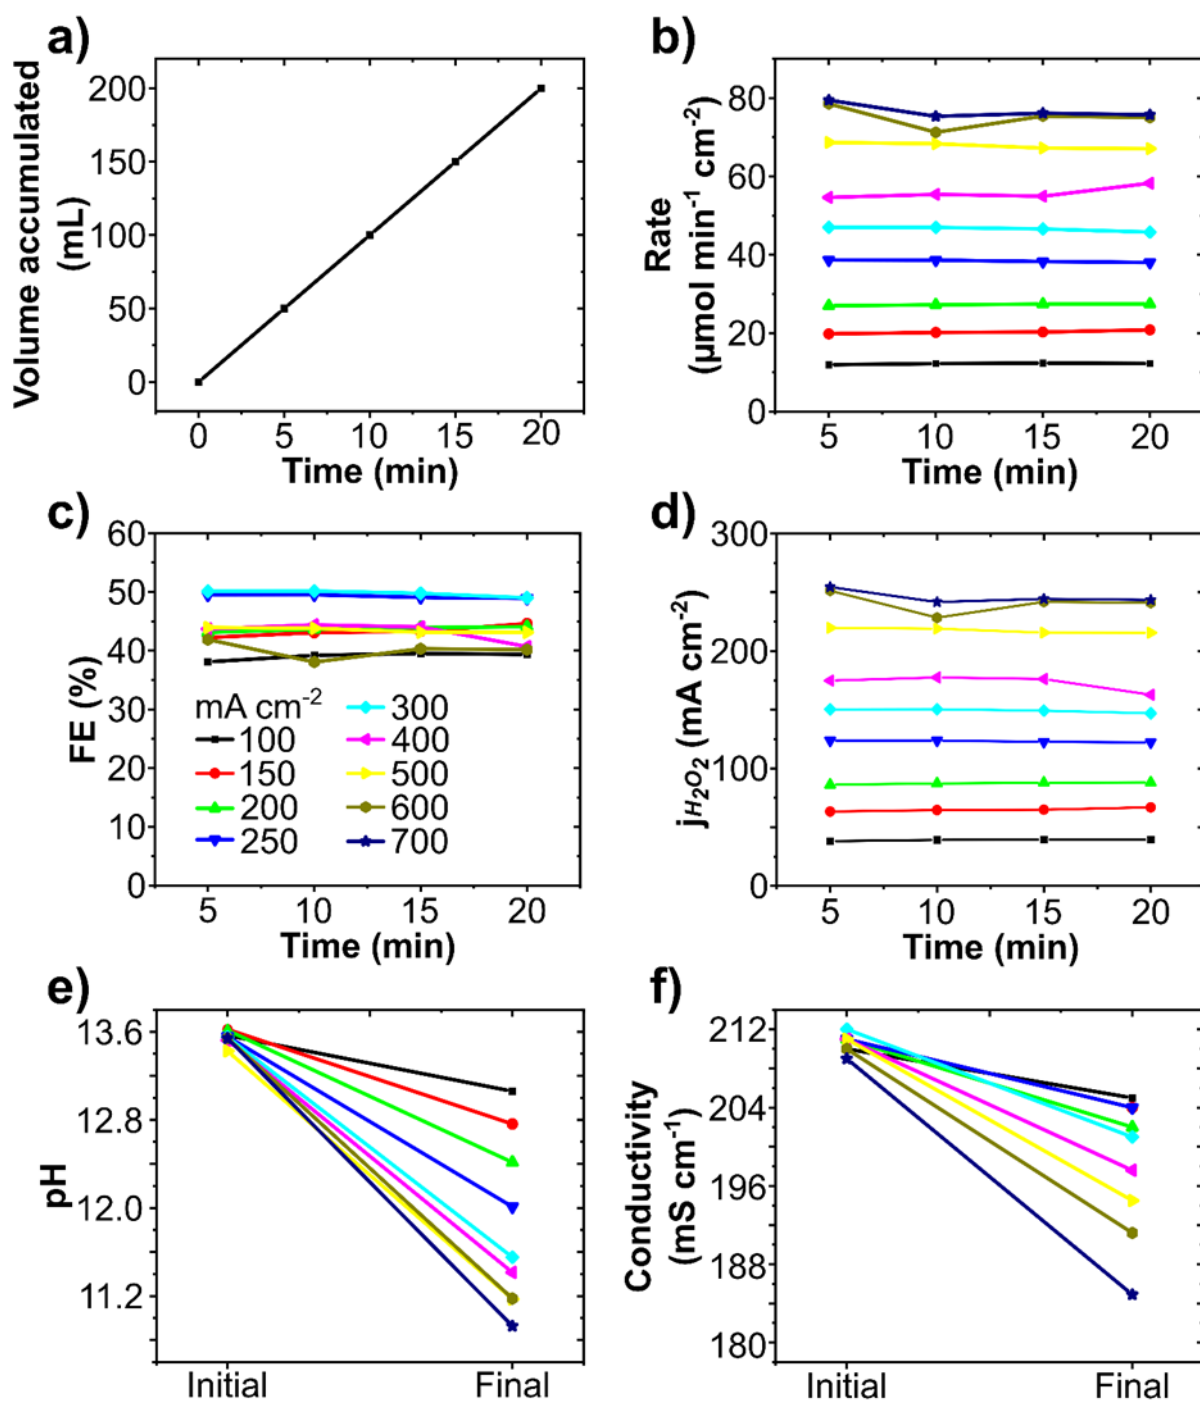

**Figure S10 Anodic  $\text{H}_2\text{O}_2$  production in a single pass mode flow reactor.** (a) Volume of electrolyte passed over time using a flow rate of  $10 \text{ mL min}^{-1}$ . (b)  $\text{H}_2\text{O}_2$  concentration, (c) FE, and (d) current density towards  $\text{H}_2\text{O}_2$  during 20 min of electrolysis. Change in (e) pH and (f) conductivity of the electrolyte at different current density in  $2 \text{ mol L}^{-1} \text{ K}_2\text{CO}_3 + 90 \text{ mmol L}^{-1} \text{ Na}_2\text{SiO}_3$ . Initial and final pH and conductivity corresponds to 0 and 20 minutes.



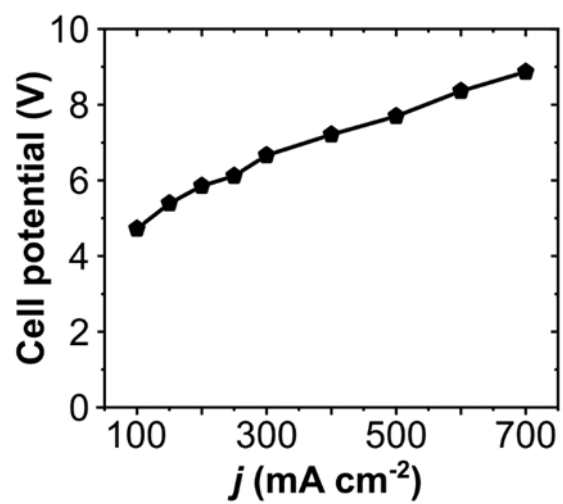

**Figure S11 Anodic  $\text{H}_2\text{O}_2$  production in a single pass mode flow reactor.** Cell potential at different current densities using  $10 \text{ mL min}^{-1}$  flow rate without recirculation in  $2 \text{ mol L}^{-1} \text{ K}_2\text{CO}_3 + 90 \text{ mmol L}^{-1} \text{ Na}_2\text{SiO}_3$ .

**Table S2** A comparison of the reported work on water oxidation to H<sub>2</sub>O<sub>2</sub> with our present study.

| Electrode                | Cell type | Electrolyte                         | Conditions* |       |     |      |     |      |                      | [H <sub>2</sub> O <sub>2</sub> ] <sub>max</sub> | Production rate | Peak FE      | Ref. |
|--------------------------|-----------|-------------------------------------|-------------|-------|-----|------|-----|------|----------------------|-------------------------------------------------|-----------------|--------------|------|
|                          |           |                                     | pH          | j/P   | t   | EA   | VA  | S    | mmol L <sup>-1</sup> | μmol min <sup>-1</sup> cm <sup>-2</sup>         | %               |              |      |
| PTFE/CFP                 | H-Cell    | 1 M Na <sub>2</sub> CO <sub>3</sub> | 12          | 100   | 420 | 0.36 | 25  | ~30  | 3                    | 23.4                                            | 66              | <sup>2</sup> |      |
| BDD/Nb                   |           |                                     | 11.9        | 39.8  | 10  | 1.13 | 8.5 | -    | -                    | 3.93                                            | 31.7            | <sup>3</sup> |      |
| BDD/Ti                   |           | 2 M KHCO <sub>3</sub>               | 8           | 120   | 5   | 7.4  | 25  | -    | ~16                  | ~8                                              | 28              | <sup>4</sup> |      |
| BDD/Ti                   |           |                                     | 8           | 295   | 5   | 7.4  | 25  | -    | 29                   | 19.7                                            | ~22             | <sup>4</sup> |      |
| CaSnO <sub>3</sub> @CF-2 | Undivided | 2 M KHCO <sub>3</sub>               | ~8.3        | 2.9 V | 10  | 1.3  | -   | -    | -                    | 39.8                                            | 90              | <sup>5</sup> |      |
| CaSnO <sub>3</sub> /FTO  |           |                                     | 8.3         | 3.2 V | 10  | -    | 30  | -    | -                    | ~4.6                                            | 76              | <sup>6</sup> |      |
| CaSnO <sub>3</sub> /FTO  |           | 8.3                                 | 2.2 V       | 720   | -   | 30   | -   | ~0.9 | -                    | -                                               | <sup>6</sup>    |              |      |
| BiVO <sub>4</sub> /FTO   |           | 1 M NaHCO <sub>3</sub>              | 8.3         | 3.1 V | -   | 1    | 20  | -    | -                    | 5.7                                             | 70              | <sup>7</sup> |      |
| BDD/Nb                   | H-Cell    | 2 M Hybrid                          | 10          | 300   | 5   | ~7   | 25  | -    | 104.6                | 76.4                                            | 82              | <sup>8</sup> |      |
| BDD/Nb                   |           | 5 M K <sub>2</sub> CO <sub>3</sub>  | >13         | 100   | 5   | ~6   | 25  | -    | 39                   | 15.6                                            | 91.5            | <sup>9</sup> |      |
| CFP                      | Flow-Cell | 2 M K <sub>2</sub> CO <sub>3</sub>  | 12.6        | 100   | 150 | 10   | 200 | 90   | 33                   | 4.5                                             | 14.3            | <sup>1</sup> |      |
| BDD/Ta                   |           |                                     |             | 300   | 40  | 10   | 200 | 90   | 76                   | 73                                              | 78              | This work    |      |
|                          |           |                                     |             | 300   | 80  | 10   | 200 | 90   | <b>110</b>           | 46                                              | 50              |              |      |
|                          |           |                                     |             | 700   | 20  | 10   | 200 | 90   | 80                   | <b>79</b>                                       | 35              |              |      |

\*j: Current density (mA cm<sup>-2</sup>), P: Potential applied (V vs. RHE), t: Time (minutes), EA: Electrode geometric area (cm<sup>2</sup>), VA: Volume of anolyte (mL), S: Stabilizer concentration (mmol L<sup>-1</sup> Na<sub>2</sub>SiO<sub>3</sub>)

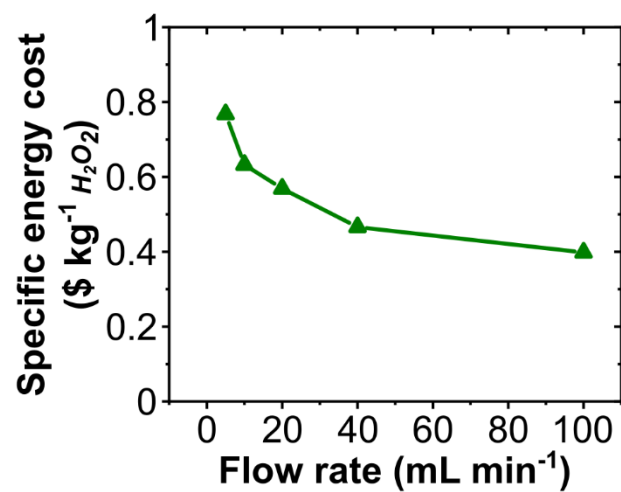

**Figure S12 Anodic H<sub>2</sub>O<sub>2</sub> generation at different electrolyte flow rates.** Specific electricity cost based on energy consumption to produce 1 kg of H<sub>2</sub>O<sub>2</sub> at different flow rates. Experiment conditions: Flow cell with 200 mL anolyte at a constant current density ( $j$ ) of 300 mA cm<sup>-2</sup>.

## References

1. D. Pangoira, L.-I. Csepei, A. Roth, C. Ponce de León, V. Sieber and L. Vieira, *Appl. Catal. B Environ.*, 2022, **303**, 120848.
2. C. Xia, S. Back, S. Ringe, K. Jiang, F. Chen, X. Sun, S. Siahrostami, K. Chan and H. Wang, *Nat. Catal.*, 2020, **3**, 125-134.
3. K. Wenderich, B. A. M. Nieuweweme, G. Mul and B. T. Mei, *ACS Sustain. Chem. Eng.*, 2021, **9**, 7803-7812.
4. S. Mavrikis, M. Göltz, S. Rosiwal, L. Wang and C. Ponce de León, *ACS Appl. Energy Mater.*, 2020, **3**, 3169-3173.
5. C. Zhang, R. Lu, C. Liu, L. Yuan, J. Wang, Y. Zhao and C. Yu, *Adv. Funct. Mater.*, 2021, **31**, 2100099.
6. S. Y. Park, H. Abroshan, X. Shi, H. S. Jung, S. Siahrostami and X. Zheng, *ACS Energy Lett.*, 2019, **4**, 352-357.
7. X. Shi, S. Siahrostami, G. L. Li, Y. Zhang, P. Chakthranont, F. Studt, T. F. Jaramillo, X. Zheng and J. K. Norskov, *Nat. Commun.*, 2017, **8**, 701.
8. S. Mavrikis, M. Göltz, S. C. Perry, F. Bogdan, P. K. Leung, S. Rosiwal, L. Wang and C. Ponce de León, *ACS Energy Lett.*, 2021, 2369-2377.
9. S. Mavrikis, M. Göltz, S. Rosiwal, L. Wang and C. Ponce de León, *ChemSusChem*, 2022, **15**, e202102137.
